# Supplementary material for: Correlation between Neutrophil-to-Lymphocyte Ratio, Platelets-to-Lymphocyte Ratio, C-Reactive Protein-to-Albumin Ratio and Clinical Picture of Elderly Chronic Heart Failure Patients
Source: MDPI journal article supplement (doi:10.3390/jcm13020433), 2024-01-12
Supplement: s1 [file s1]

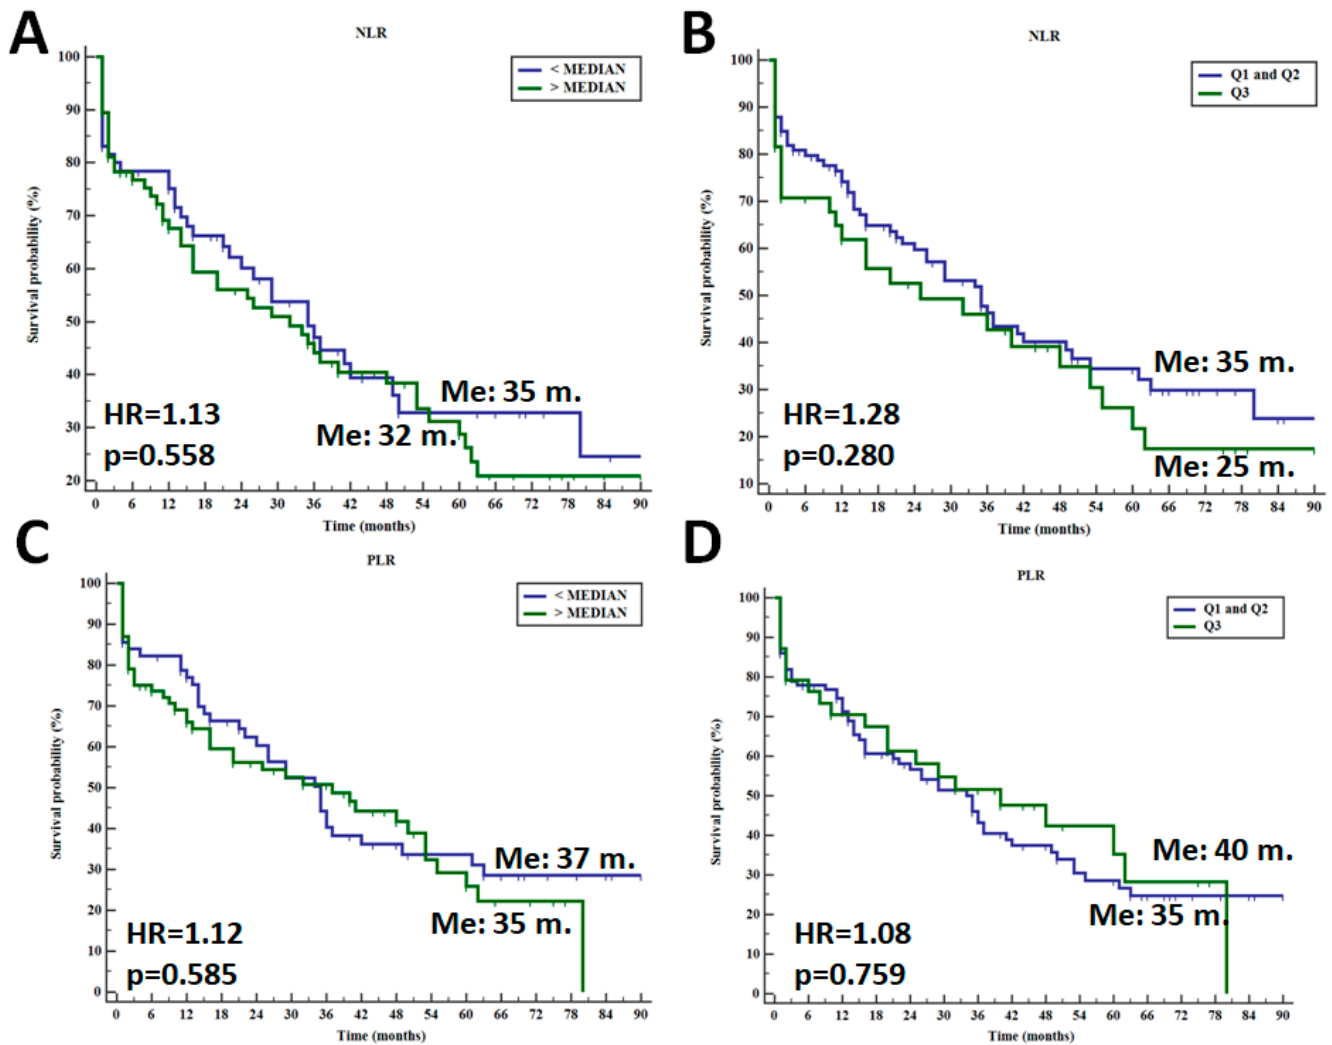

**Supplementary Figure S1.** Overall survival in CHF patients depending on median NLR value (A) and NLR value within Q1+Q2 and Q3 (B) as well as overall survival in CHF patients depending on median PLR value (C) and PLR value within Q1+Q2 and Q3 (D)

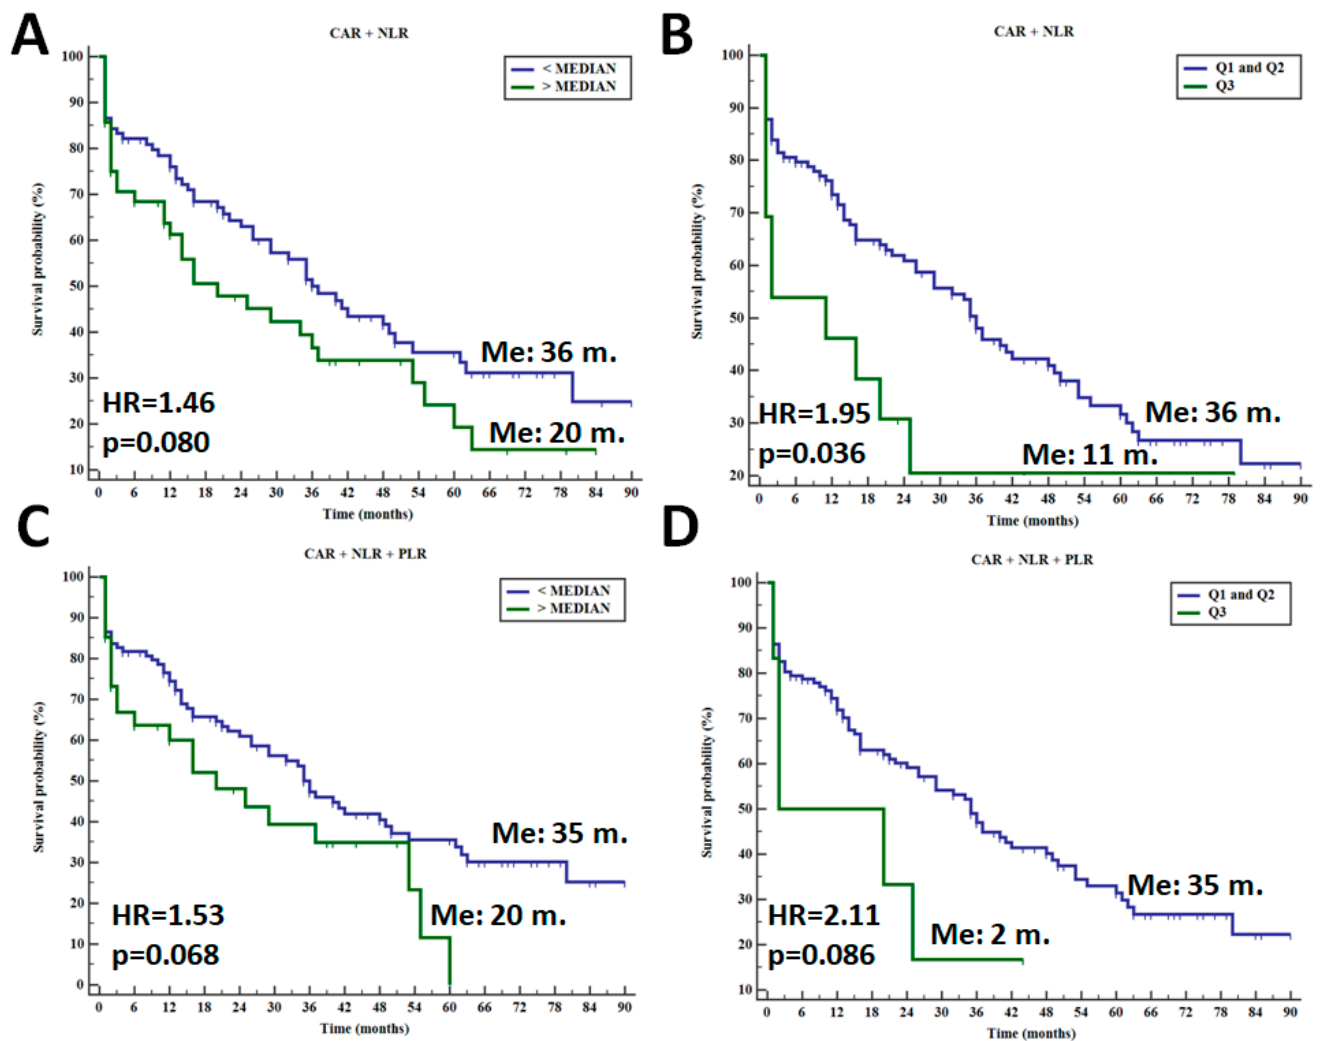

**Supplementary Figure S2.** Overall survival in CHF patients depending on combination of: median CAR and NLR values (A), CAR and NLR values within Q1+Q2 and Q3 (B) as well as overall survival in CHF patients depending on combination of median CAR, NLR and PLR values (C) and CAR, NLR and PLE values within Q1+Q2 and Q3 (D)
